# Supplementary material
Source: PubMed Central journal article supplement (PMC8846452)
Supplement: aac.02046-21-s0001.pdf [file aac.02046-21-s0001.pdf]

## Supplement Material

### Cefepime precision dosing tool: From Standard to Precise Dose Using Nonparametric Population Pharmacokinetics

Mohammad H. Al-Shaer, Sylvain Goutelle, Barbara Santevecchi, Bethany Shoulders, Veena Venugopalan, Kartikeya Cherabuddi, Jiajun Liu, Patrick J. Kiel, Jason A. Roberts, Fekade Bruck Sime, Marc H. Scheetz, Michael N. Neely, Charles A. Peloquin

#### Methods

##### *Optimal initial dosing simulations*

Matlab software vR2018b (The MathWorks Inc., Natick, MA, USA) was used then to calculate the OID of cefepime based on the final nonparametric model developed earlier [1,2]. Taking the support points generated by the nonparametric population PK model along with the associated probability and the influence of individual covariates, the *a priori* probability to reach a target PK/PD parameter can be calculated.

$C_{min}$  was used as criteria to compute OID, after correction for cefepime protein binding (20%) [3]. For example, for a MIC cut-off of 8 mg/L,  $fC_{min}:MIC$  of 1 and 4 were translated to  $C_{min}$  target of 10 and 40 mg/L, respectively.

For a given dose ( $dose_j$ ) of cefepime, the *a priori* probability (target attainment rate, TAR) that  $C_{min}$  is equal to or greater than a target value X is :

$$TAR(dose_j) = \sum_{i=0}^n prob_i (C_{min,i} \geq X)$$

where  $prob_i$  are the probabilities related to each of the support points of the nonparametric model, and  $C_{min,i}$  calculated for one possible set of PK parameters associated with  $prob_i$ .

The OID was computed as follows:

$$OID = \min[\arg\{TAR_{dose\ j} \geq 0.9\}]$$

In other words, the optimal dose was the minimal dose associated with 90% *a priori* probability of  $C_{\min} \geq X$ . The algorithm was used to identify the optimal dose associated with maximum probability to achieve a target interval (i.e.  $X \leq C_{\min} \leq Y$ ). We used this approach to derive the OID targeting  $fC_{\min}:\text{MIC}$  1 to 4, assuming a MIC of 8 mg/L (equivalent to  $10 \leq C_{\min} \leq 40$  mg/L). OIDs were computed for adults and children separately, as those two populations presented different PK parameter values in the final model. An optimal dose was calculated for a pair of body weight and CrCl. In adults, we considered weight ranging from 30 to 250 kg, and CrCl ranging from 20 to 200 ml/min, with increments of 10 kg and 10 mL/min, respectively. In children, weight and CrCl ranges were 5-40 kg (5 kg increment) and 20-120 mL/min (10 mL/min increment), respectively.

Various candidate dosing regimens of cefepime were tested. In adults, 9 extended-infusion regimens were examined, with increasing magnitude, as follows: 0.5 g q 24 hr, 1g q 24 hr, 2 g q 24 hr, 0.5 g q 12 hr, 1 g q 12 hr, 2 g q 12 hr, 0.5 g q 8 hr, 1 g q 8 hr, and 2 g q 8 h. The infusion time was 4 hr for all these extended regimens. We also tested 4 continuous infusion regimens of 2, 4, 6 and 8g/24h. In children, three extended regimens (50 mg/kg q 24, 12 and 8 h as a 4-hr infusion) and four continuous infusion regimens (50, 100, 150 and 200 mg/kg/24h) were tested. Since increases in doses will eventually hit the PK/PD target of interest, we chose the lowest dose achieving that target as the optimal dose. When no extended regimen was optimal, the lowest continuous infusion regimen was selected.

To assess the adequacy of dosage regimens generated by this approach, the OID was simulated for each patient in the validation dataset using their individual PK parameters predicted by the PK model and the target attainment assessed. Results were compared to those obtained by simulating the administration of the dose recommended in the drug label.

## References

- [1] D'Argenio DZ, Rodman JH. Targeting the systemic exposure of teniposide in the population and the individual using a stochastic therapeutic objective. *Journal of pharmacokinetics and biopharmaceutics*. 1993 Apr 1;21(2):223-51.
- [2] Boidin C, Bourguignon L, Cohen S, Roger C, Lefrant JY, Roberts JA, Allaouchiche B, Lepape A, Friggeri A, Goutelle S. Amikacin initial dose in critically ill patients: a nonparametric approach to optimize a priori pharmacokinetic/pharmacodynamic target attainments in individual patients. *Antimicrobial agents and chemotherapy*. 2019 Nov 1;63(11):e00993-19.
- [3] Bristol-Myers Squibb. Maxipime (cefepime) package insert. 2007. Bristol-Myers Squibb, New York, NY.

**Figure S1. How BestDose uses the PK model to generate the drug exposure after revising the probability of support points**

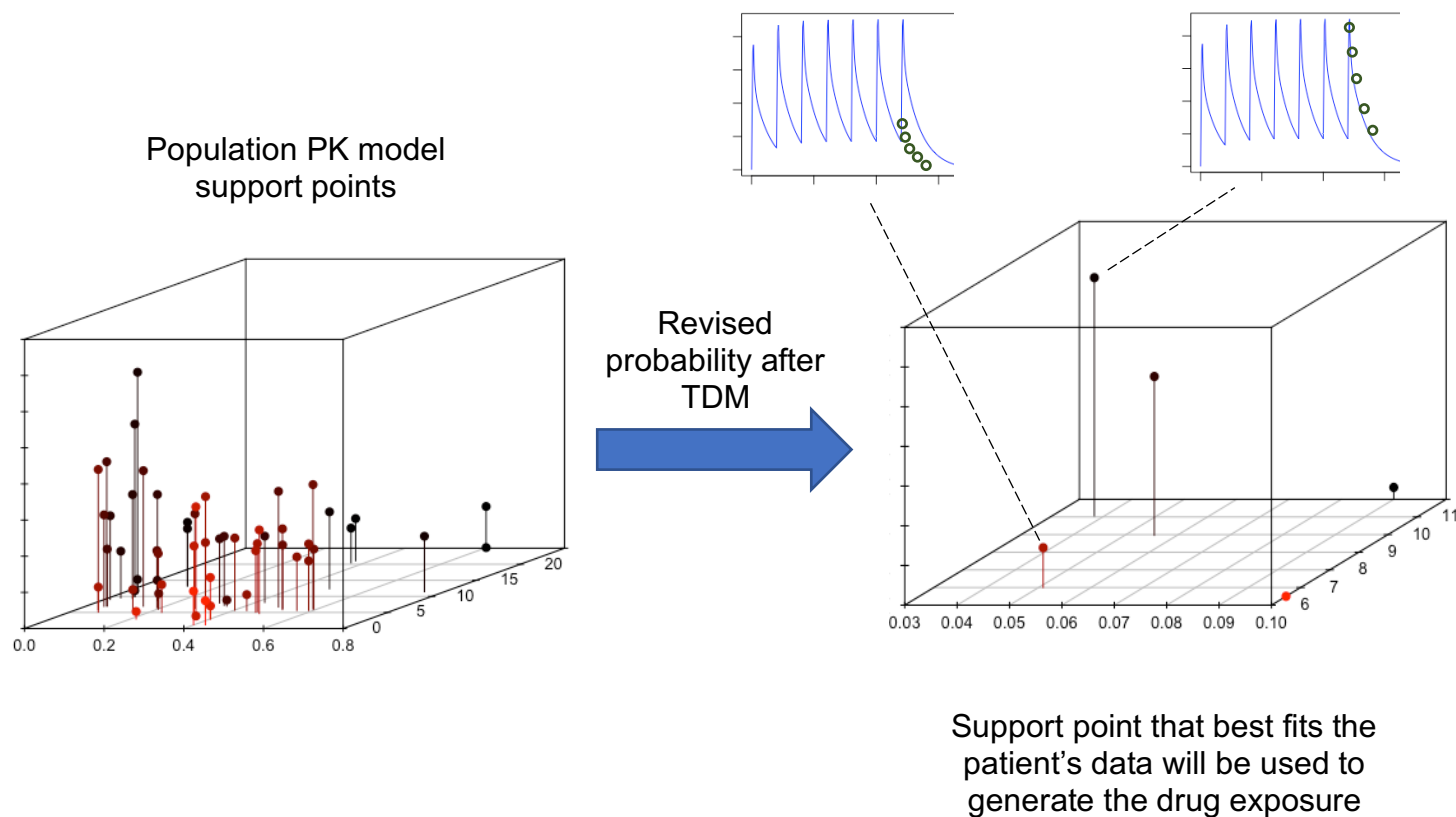

PK, pharmacokinetic; TDM, therapeutic drug monitoring

Figure S2: Visual predicted checks and weighted residual error plots

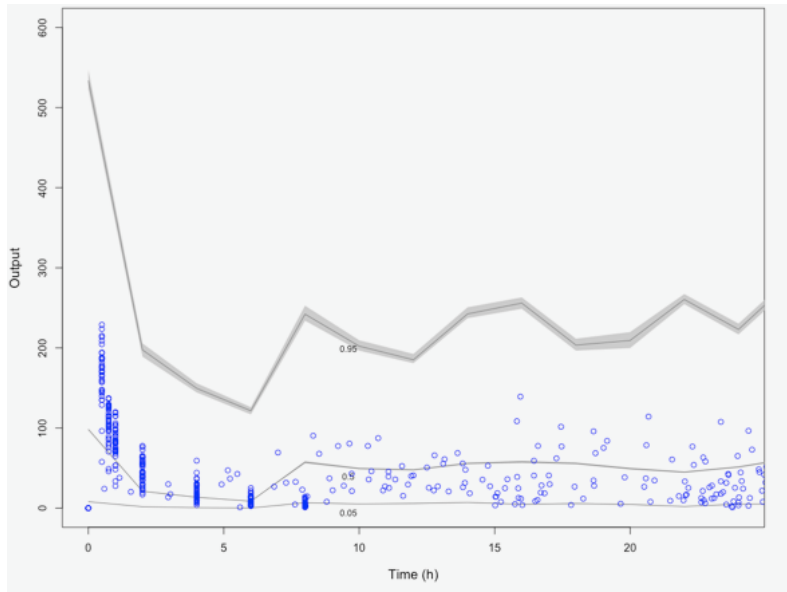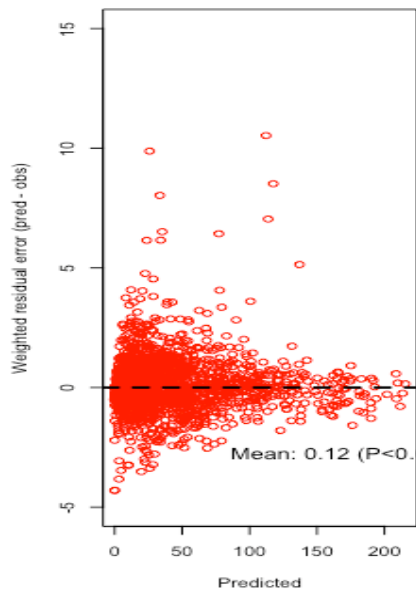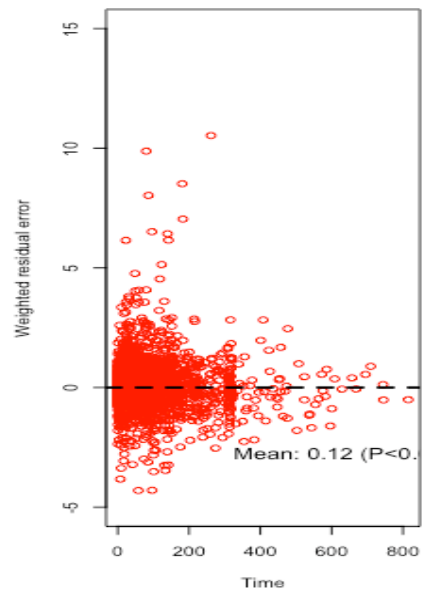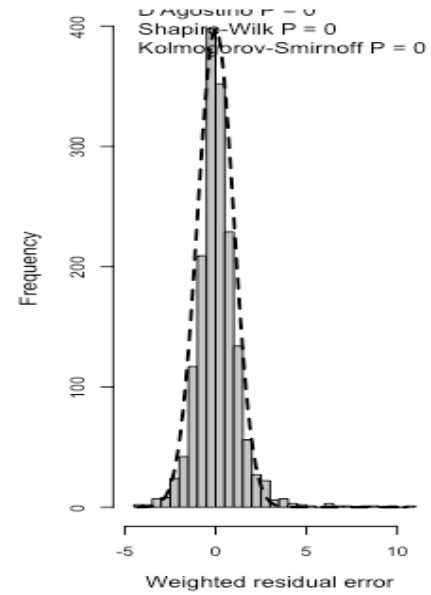

**Figure S3. Support points generated by cefepime population pharmacokinetic model**

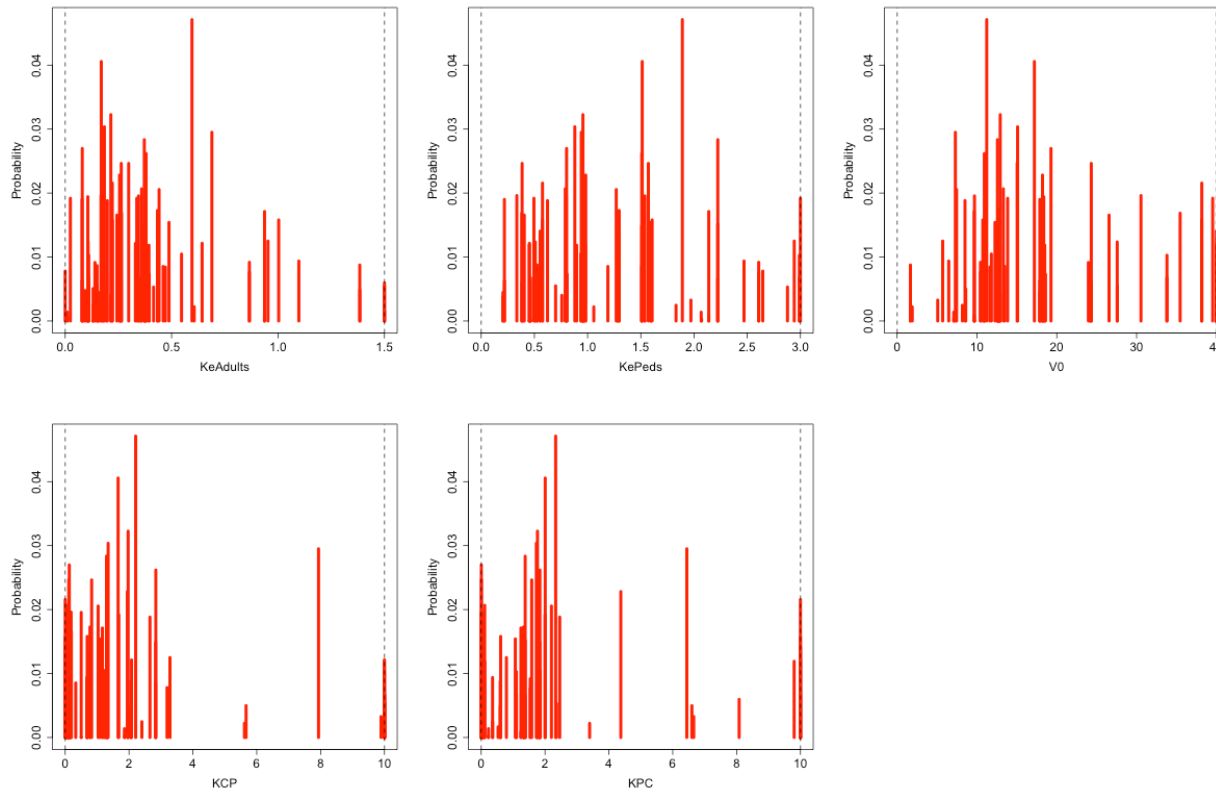

$k_{cp}$ , rate of transfer from the central to the peripheral compartment;  $k_e$ , elimination rate constant;  $k_{pc}$ ; rate of transfer from the peripheral to the central compartment;  $V_0$ , central volume of distribution.

**Figure S4. Observed versus population and individual predicted cefepime concentration in the validation dataset**

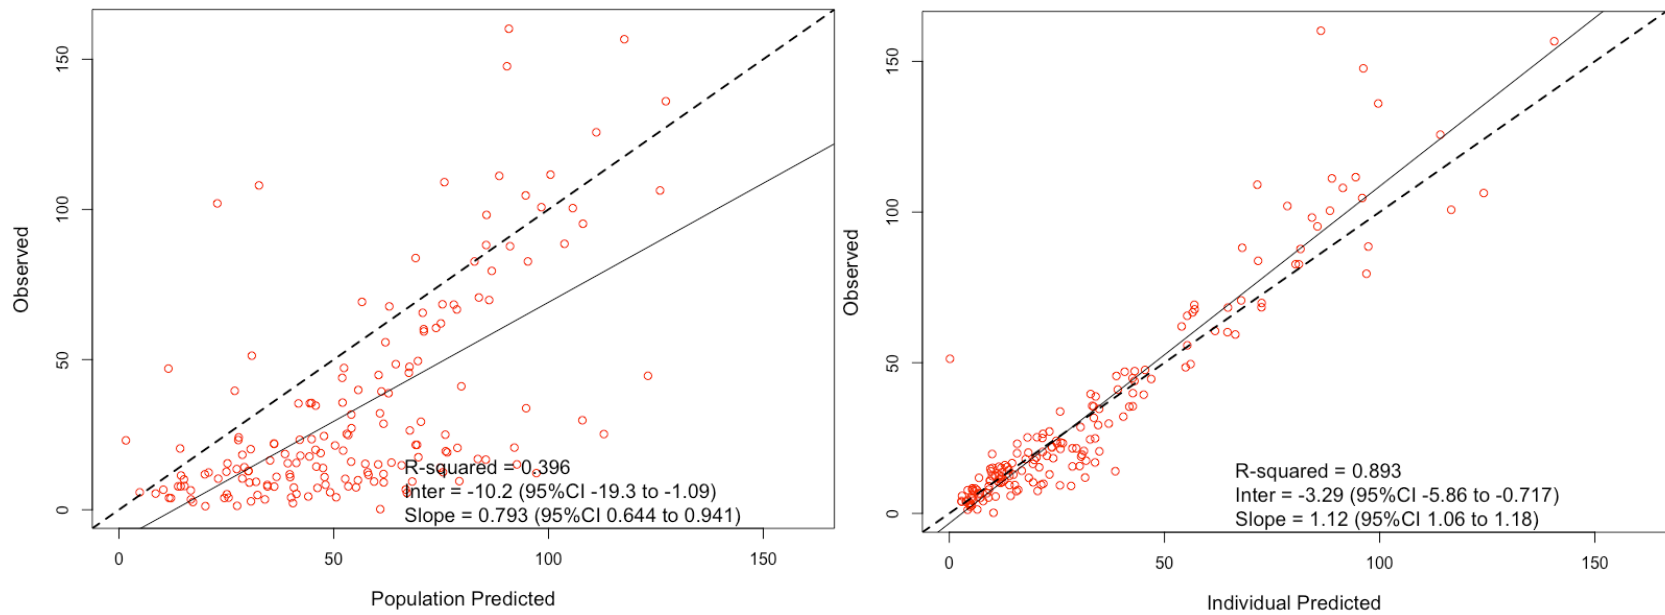

**Table S1: Optimal initial dose in adult patients and associated probability to achieve  $fC_{min}:MIC$  1 to 4 (MIC 8 mg/L)\***

|     |            | Body weight |            |         |            |         |            |         |            |         |            |         |            |         |            |         |     |
|-----|------------|-------------|------------|---------|------------|---------|------------|---------|------------|---------|------------|---------|------------|---------|------------|---------|-----|
|     |            | 30          |            | 40      |            | 50      |            | 60      |            | 70      |            | 80      |            | 90      |            | 100     |     |
| CCR |            | Regimen     | PTA        | Regimen | PTA        | Regimen | PTA        | Regimen | PTA        | Regimen | PTA        | Regimen | PTA        | Regimen | PTA        | Regimen | PTA |
| 20  | 0.5g q24h  | 0.621       | 0.5g q24h  | 0.623   | 0.5g q24h  | 0.628   | 0.5g q24h  | 0.655   | 1g q24h    | 0.636   | 1g q24h    | 0.609   | 0.5 g q12h | 0.629   | 0.5 g q12h | 0.654   |     |
| 30  | 1g q24h    | 0.604       | 1g q24h    | 0.689   | 0.5 g q12h | 0.671   | 0.5 g q12h | 0.749   | 0.5 g q12h | 0.729   | 0.5 g q12h | 0.658   | 0.5 g q12h | 0.627   | 0.5 g q8h  | 0.696   |     |
| 40  | 0.5 g q12h | 0.589       | 0.5 g q12h | 0.691   | 0.5 g q12h | 0.728   | 0.5 g q12h | 0.701   | 0.5 g q12h | 0.727   | 0.5 g q8h  | 0.741   | 0.5 g q8h  | 0.774   | 0.5 g q8h  | 0.774   |     |
| 50  | 0.5 g q12h | 0.692       | 0.5 g q12h | 0.690   | 0.5 g q12h | 0.677   | 0.5 g q8h  | 0.754   | 0.5 g q8h  | 0.738   | 0.5 g q8h  | 0.728   | 0.5 g q8h  | 0.769   | 0.5 g q8h  | 0.826   |     |
| 60  | 0.5 g q8h  | 0.572       | 0.5 g q8h  | 0.695   | 0.5 g q8h  | 0.712   | 0.5 g q8h  | 0.701   | 0.5 g q8h  | 0.809   | 0.5 g q8h  | 0.814   | 1g q12h    | 0.755   | 2g/24h CI  | 0.772   |     |
| 70  | 0.5 g q8h  | 0.639       | 0.5 g q8h  | 0.688   | 0.5 g q8h  | 0.701   | 0.5 g q8h  | 0.785   | 0.5 g q8h  | 0.734   | 2g/24h CI  | 0.772   | 2g/24h CI  | 0.772   | 2g/24h CI  | 0.879   |     |
| 80  | 0.5 g q8h  | 0.642       | 0.5 g q8h  | 0.690   | 0.5 g q8h  | 0.739   | 2g/24h CI  | 0.692   | 2g/24h CI  | 0.741   | 2g/24h CI  | 0.813   | 2g/24h CI  | 0.863   | 2g/24h CI  | 0.860   |     |
| 90  | 0.5 g q8h  | 0.659       | 0.5 g q8h  | 0.651   | 2g/24h CI  | 0.695   | 2g/24h CI  | 0.722   | 2g/24h CI  | 0.843   | 2g/24h CI  | 0.851   | 2g/24h CI  | 0.848   | 2g/24h CI  | 0.839   |     |
| 100 | 0.5 g q8h  | 0.663       | 2g/24h CI  | 0.656   | 2g/24h CI  | 0.722   | 2g/24h CI  | 0.782   | 2g/24h CI  | 0.851   | 2g/24h CI  | 0.848   | 2g/24h CI  | 0.801   | 2g/24h CI  | 0.794   |     |
| 110 | 0.5 g q8h  | 0.603       | 2g/24h CI  | 0.688   | 2g/24h CI  | 0.722   | 2g/24h CI  | 0.848   | 2g/24h CI  | 0.848   | 2g/24h CI  | 0.776   | 2g/24h CI  | 0.794   | 2g/24h CI  | 0.728   |     |
| 120 | 2g/24h CI  | 0.620       | 2g/24h CI  | 0.718   | 2g/24h CI  | 0.833   | 2g/24h CI  | 0.835   | 2g/24h CI  | 0.776   | 2g/24h CI  | 0.794   | 2g/24h CI  | 0.728   | 4g/24h CI  | 0.722   |     |
| 130 | 2g/24h CI  | 0.637       | 2g/24h CI  | 0.718   | 2g/24h CI  | 0.821   | 2g/24h CI  | 0.813   | 2g/24h CI  | 0.769   | 2g/24h CI  | 0.728   | 4g/24h CI  | 0.718   | 4g/24h CI  | 0.722   |     |
| 140 | 2g/24h CI  | 0.669       | 2g/24h CI  | 0.829   | 2g/24h CI  | 0.817   | 2g/24h CI  | 0.776   | 2g/24h CI  | 0.782   | 4g/24h CI  | 0.718   | 4g/24h CI  | 0.722   | 4g/24h CI  | 0.848   |     |
| 150 | 2g/24h CI  | 0.699       | 2g/24h CI  | 0.801   | 2g/24h CI  | 0.813   | 2g/24h CI  | 0.769   | 2g/24h CI  | 0.716   | 4g/24h CI  | 0.718   | 4g/24h CI  | 0.829   | 4g/24h CI  | 0.821   |     |
| 160 | 2g/24h CI  | 0.699       | 2g/24h CI  | 0.804   | 2g/24h CI  | 0.776   | 2g/24h CI  | 0.759   | 4g/24h CI  | 0.699   | 4g/24h CI  | 0.762   | 4g/24h CI  | 0.833   | 4g/24h CI  | 0.804   |     |
| 170 | 2g/24h CI  | 0.770       | 2g/24h CI  | 0.783   | 2g/24h CI  | 0.769   | 2g/24h CI  | 0.716   | 4g/24h CI  | 0.718   | 4g/24h CI  | 0.813   | 4g/24h CI  | 0.821   | 4g/24h CI  | 0.813   |     |
| 180 | 2g/24h CI  | 0.790       | 2g/24h CI  | 0.783   | 2g/24h CI  | 0.757   | 4g/24h CI  | 0.699   | 4g/24h CI  | 0.789   | 4g/24h CI  | 0.821   | 4g/24h CI  | 0.817   | 4g/24h CI  | 0.813   |     |
| 190 | 2g/24h CI  | 0.782       | 2g/24h CI  | 0.776   | 2g/24h CI  | 0.734   | 4g/24h CI  | 0.699   | 4g/24h CI  | 0.813   | 4g/24h CI  | 0.804   | 4g/24h CI  | 0.783   | 4g/24h CI  | 0.776   |     |
| 200 | 2g/24h CI  | 0.765       | 2g/24h CI  | 0.769   | 4g/24h CI  | 0.691   | 4g/24h CI  | 0.739   | 4g/24h CI  | 0.801   | 4g/24h CI  | 0.817   | 4g/24h CI  | 0.776   | 4g/24h CI  | 0.769   |     |

|     |            | Body weight |            |         |            |         |            |         |            |         |            |         |            |         |           |         |     |
|-----|------------|-------------|------------|---------|------------|---------|------------|---------|------------|---------|------------|---------|------------|---------|-----------|---------|-----|
|     |            | 110         |            | 120     |            | 130     |            | 140     |            | 150     |            | 160     |            | 170     |           | 180     |     |
| CCR |            | Regimen     | PTA        | Regimen | PTA        | Regimen | PTA        | Regimen | PTA        | Regimen | PTA        | Regimen | PTA        | Regimen | PTA       | Regimen | PTA |
| 20  | 0.5 g q12h | 0.712       | 0.5 g q12h | 0.664   | 0.5 g q12h | 0.674   | 0.5 g q12h | 0.650   | 0.5 g q12h | 0.645   | 0.5 g q12h | 0.645   | 0.5 g q12h | 0.686   | 0.5 g q8h | 0.657   |     |
| 30  | 0.5 g q8h  | 0.772       | 0.5 g q8h  | 0.747   | 0.5 g q8h  | 0.757   | 0.5 g q8h  | 0.733   | 1g q12h    | 0.735   | 1g q12h    | 0.722   | 1g q12h    | 0.717   | 2g/24h CI | 0.767   |     |
| 40  | 0.5 g q8h  | 0.749       | 1g q12h    | 0.732   | 0.5 g q8h  | 0.779   | 2g/24h CI  | 0.767   | 2g/24h CI  | 0.769   | 2g/24h CI  | 0.769   | 2g/24h CI  | 0.789   | 2g/24h CI | 0.789   |     |
| 50  | 2g/24h CI  | 0.741       | 2g/24h CI  | 0.744   | 2g/24h CI  | 0.789   | 2g/24h CI  | 0.789   | 2g/24h CI  | 0.830   | 2g/24h CI  | 0.864   | 2g/24h CI  | 0.864   | 2g/24h CI | 0.852   |     |
| 60  | 2g/24h CI  | 0.764       | 2g/24h CI  | 0.860   | 2g/24h CI  | 0.864   | 2g/24h CI  | 0.852   | 2g/24h CI  | 0.852   | 2g/24h CI  | 0.824   | 2g/24h CI  | 0.804   | 1g q8h    | 0.769   |     |
| 70  | 2g/24h CI  | 0.852       | 2g/24h CI  | 0.852   | 2g/24h CI  | 0.831   | 2g/24h CI  | 0.824   | 1g q8h     | 0.826   | 1g q8h     | 0.814   | 1g q8h     | 0.763   | 4g/24h CI | 0.742   |     |
| 80  | 2g/24h CI  | 0.831       | 1g q8h     | 0.809   | 2g/24h CI  | 0.786   | 2g/24h CI  | 0.736   | 1g q8h     | 0.726   | 4g/24h CI  | 0.748   | 4g/24h CI  | 0.772   | 4g/24h CI | 0.772   |     |
| 90  | 2g/24h CI  | 0.786       | 2g/24h CI  | 0.756   | 2g/24h CI  | 0.701   | 4g/24h CI  | 0.701   | 4g/24h CI  | 0.768   | 4g/24h CI  | 0.772   | 4g/24h CI  | 0.813   | 4g/24h CI | 0.879   |     |
| 100 | 2g/24h CI  | 0.730       | 4g/24h CI  | 0.701   | 4g/24h CI  | 0.722   | 4g/24h CI  | 0.741   | 4g/24h CI  | 0.813   | 4g/24h CI  | 0.863   | 4g/24h CI  | 0.863   | 4g/24h CI | 0.835   |     |
| 110 | 4g/24h CI  | 0.722       | 4g/24h CI  | 0.722   | 4g/24h CI  | 0.782   | 4g/24h CI  | 0.879   | 4g/24h CI  | 0.863   | 4g/24h CI  | 0.835   | 4g/24h CI  | 0.835   | 4g/24h CI | 0.813   |     |
| 120 | 4g/24h CI  | 0.722       | 4g/24h CI  | 0.812   | 4g/24h CI  | 0.863   | 4g/24h CI  | 0.851   | 4g/24h CI  | 0.835   | 4g/24h CI  | 0.813   | 4g/24h CI  | 0.813   | 4g/24h CI | 0.794   |     |
| 130 | 4g/24h CI  | 0.848       | 4g/24h CI  | 0.833   | 4g/24h CI  | 0.835   | 4g/24h CI  | 0.848   | 4g/24h CI  | 0.813   | 4g/24h CI  | 0.776   | 4g/24h CI  | 0.794   | 4g/24h CI | 0.794   |     |
| 140 | 4g/24h CI  | 0.821       | 4g/24h CI  | 0.835   | 4g/24h CI  | 0.813   | 4g/24h CI  | 0.813   | 4g/24h CI  | 0.776   | 4g/24h CI  | 0.794   | 6g/24h CI  | 0.848   | 6g/24h CI | 0.833   |     |
| 150 | 4g/24h CI  | 0.835       | 4g/24h CI  | 0.813   | 4g/24h CI  | 0.776   | 4g/24h CI  | 0.769   | 4g/24h CI  | 0.794   | 6g/24h CI  | 0.833   | 6g/24h CI  | 0.833   | 6g/24h CI | 0.851   |     |
| 160 | 4g/24h CI  | 0.813       | 4g/24h CI  | 0.776   | 4g/24h CI  | 0.769   | 4g/24h CI  | 0.794   | 6g/24h CI  | 0.833   | 6g/24h CI  | 0.821   | 6g/24h CI  | 0.835   | 6g/24h CI | 0.848   |     |
| 170 | 4g/24h CI  | 0.776       | 4g/24h CI  | 0.769   | 6g/24h CI  | 0.797   | 6g/24h CI  | 0.833   | 6g/24h CI  | 0.821   | 6g/24h CI  | 0.804   | 6g/24h CI  | 0.848   | 6g/24h CI | 0.813   |     |
| 180 | 4g/24h CI  | 0.776       | 4g/24h CI  | 0.769   | 6g/24h CI  | 0.813   | 6g/24h CI  | 0.821   | 6g/24h CI  | 0.804   | 6g/24h CI  | 0.813   | 6g/24h CI  | 0.813   | 8g/24h CI | 0.829   |     |
| 190 | 4g/24h CI  | 0.769       | 6g/24h CI  | 0.813   | 6g/24h CI  | 0.821   | 6g/24h CI  | 0.804   | 6g/24h CI  | 0.813   | 6g/24h CI  | 0.813   | 8g/24h CI  | 0.829   | 8g/24h CI | 0.833   |     |
| 200 | 6g/24h CI  | 0.813       | 6g/24h CI  | 0.821   | 6g/24h CI  | 0.804   | 6g/24h CI  | 0.783   | 6g/24h CI  | 0.813   | 8g/24h CI  | 0.813   | 8g/24h CI  | 0.833   | 8g/24h CI | 0.821   |     |



|     |     | Body weight |       |           |       |           |       |           |       |           |       |           |       |           |       |
|-----|-----|-------------|-------|-----------|-------|-----------|-------|-----------|-------|-----------|-------|-----------|-------|-----------|-------|
|     |     | 190         |       | 200       |       | 210       |       | 220       |       | 230       |       | 240       |       | 250       |       |
| CCR |     | Regimen     | PTA   | Regimen   | PTA   | Regimen   | PTA   | Regimen   | PTA   | Regimen   | PTA   | Regimen   | PTA   | Regimen   | PTA   |
|     | 20  | 0.5 g q12h  | 0.670 | 0.5 g q8h | 0.719 | 0.5 g q8h | 0.702 | 0.5 g q8h | 0.695 | 0.5 g q8h | 0.664 | 1g q12h   | 0.663 | 2g q24h   | 0.661 |
|     | 30  | 2g/24h CI   | 0.757 | 2g/24h CI | 0.757 | 2g/24h CI | 0.757 | 2g/24h CI | 0.750 | 0.5 g q8h | 0.724 | 0.5 g q8h | 0.719 | 2g/24h CI | 0.716 |
|     | 40  | 1g q8h      | 0.772 | 2g/24h CI | 0.794 | 2g/24h CI | 0.823 | 2g/24h CI | 0.807 | 1g q8h    | 0.789 | 2g/24h CI | 0.788 | 2g q12h   | 0.772 |
|     | 50  | 2g/24h CI   | 0.806 | 2g/24h CI | 0.802 | 2g/24h CI | 0.736 | 2g/24h CI | 0.736 | 1g q8h    | 0.749 | 1g q8h    | 0.779 | 1g q8h    | 0.779 |
|     | 60  | 1g q8h      | 0.826 | 1g q8h    | 0.826 | 1g q8h    | 0.764 | 1g q8h    | 0.738 | 4g/24h CI | 0.744 | 4g/24h CI | 0.744 | 4g/24h CI | 0.789 |
|     | 70  | 2g q12h     | 0.791 | 4g/24h CI | 0.772 | 4g/24h CI | 0.764 | 4g/24h CI | 0.764 | 4g/24h CI | 0.764 | 4g/24h CI | 0.830 | 4g/24h CI | 0.897 |
|     | 80  | 4g/24h CI   | 0.772 | 4g/24h CI | 0.813 | 4g/24h CI | 0.871 | 4g/24h CI | 0.881 | 4g/24h CI | 0.864 | 4g/24h CI | 0.852 | 4g/24h CI | 0.852 |
|     | 90  | 4g/24h CI   | 0.863 | 4g/24h CI | 0.835 | 4g/24h CI | 0.852 | 4g/24h CI | 0.852 | 4g/24h CI | 0.866 | 4g/24h CI | 0.831 | 4g/24h CI | 0.824 |
|     | 100 | 4g/24h CI   | 0.835 | 4g/24h CI | 0.874 | 4g/24h CI | 0.831 | 4g/24h CI | 0.831 | 2g q8h    | 0.797 | 4g/24h CI | 0.786 | 6g/24h CI | 0.813 |
|     | 110 | 4g/24h CI   | 0.839 | 4g/24h CI | 0.794 | 4g/24h CI | 0.786 | 6g/24h CI | 0.813 | 6g/24h CI | 0.813 | 6g/24h CI | 0.879 | 6g/24h CI | 0.863 |
|     | 120 | 4g/24h CI   | 0.794 | 4g/24h CI | 0.794 | 6g/24h CI | 0.879 | 6g/24h CI | 0.863 | 6g/24h CI | 0.851 | 6g/24h CI | 0.835 | 6g/24h CI | 0.835 |
|     | 130 | 6g/24h CI   | 0.848 | 6g/24h CI | 0.863 | 6g/24h CI | 0.851 | 6g/24h CI | 0.835 | 6g/24h CI | 0.835 | 6g/24h CI | 0.848 | 6g/24h CI | 0.813 |
|     | 140 | 6g/24h CI   | 0.851 | 6g/24h CI | 0.835 | 6g/24h CI | 0.835 | 6g/24h CI | 0.848 | 6g/24h CI | 0.813 | 6g/24h CI | 0.813 | 8g/24h CI | 0.848 |
|     | 150 | 6g/24h CI   | 0.835 | 6g/24h CI | 0.848 | 6g/24h CI | 0.813 | 6g/24h CI | 0.813 | 8g/24h CI | 0.848 | 8g/24h CI | 0.833 | 8g/24h CI | 0.863 |
|     | 160 | 6g/24h CI   | 0.813 | 6g/24h CI | 0.813 | 8g/24h CI | 0.848 | 8g/24h CI | 0.833 | 8g/24h CI | 0.833 | 8g/24h CI | 0.851 | 8g/24h CI | 0.835 |
|     | 170 | 6g/24h CI   | 0.776 | 8g/24h CI | 0.833 | 8g/24h CI | 0.833 | 8g/24h CI | 0.821 | 8g/24h CI | 0.835 | 8g/24h CI | 0.835 | 8g/24h CI | 0.848 |
|     | 180 | 8g/24h CI   | 0.833 | 8g/24h CI | 0.821 | 8g/24h CI | 0.821 | 8g/24h CI | 0.835 | 8g/24h CI | 0.848 | 8g/24h CI | 0.813 | 8g/24h CI | 0.813 |
|     | 190 | 8g/24h CI   | 0.821 | 8g/24h CI | 0.804 | 8g/24h CI | 0.848 | 8g/24h CI | 0.813 | 8g/24h CI | 0.813 | 8g/24h CI | 0.776 | 8g/24h CI | 0.776 |
|     | 200 | 8g/24h CI   | 0.804 | 8g/24h CI | 0.817 | 8g/24h CI | 0.813 | 8g/24h CI | 0.813 | 8g/24h CI | 0.776 | 8g/24h CI | 0.776 | 8g/24h CI | 0.769 |

CCR, creatinine clearance in mL/min; CI, continuous infusion; PTA, probability of target attainment.

\* All extended regimens are infused over 4 hours.

**Table S2: Optimal initial dose in pediatric patients and associated probability to achieve  $fC_{min}:MIC$  1 to 4 (MIC 8 mg/L)\***

|     |     | Body weight      |       |                  |       |                  |       |                  |       |
|-----|-----|------------------|-------|------------------|-------|------------------|-------|------------------|-------|
|     |     | 5                |       | 10               |       | 15               |       | 20               |       |
| CCR |     | Regimen          | PTA   | Regimen          | PTA   | Regimen          | PTA   | Regimen          | PTA   |
|     | 20  | 50 mg/kg/24h CI  | 0.782 | 50 mg/kg/24h CI  | 0.672 | 50 mg/kg/24h CI  | 0.671 | 50 mg/kg/24h CI  | 0.622 |
|     | 30  | 50 mg/kg/24h CI  | 0.843 | 50 mg/kg/24h CI  | 0.843 | 50 mg/kg/24h CI  | 0.822 | 50 mg/kg/24h CI  | 0.817 |
|     | 40  | 100 mg/kg/24h CI | 0.751 | 50 mg/kg/24h CI  | 0.805 | 50 mg/kg/24h CI  | 0.843 | 50 mg/kg/24h CI  | 0.843 |
|     | 50  | 100 mg/kg/24h CI | 0.843 | 100 mg/kg/24h CI | 0.787 | 100 mg/kg/24h CI | 0.751 | 50 mg/kg/24h CI  | 0.765 |
|     | 60  | 100 mg/kg/24h CI | 0.843 | 100 mg/kg/24h CI | 0.843 | 100 mg/kg/24h CI | 0.822 | 100 mg/kg/24h CI | 0.787 |
|     | 70  | 150 mg/kg/24h CI | 0.822 | 100 mg/kg/24h CI | 0.843 | 100 mg/kg/24h CI | 0.843 | 100 mg/kg/24h CI | 0.843 |
|     | 80  | 150 mg/kg/24h CI | 0.843 | 100 mg/kg/24h CI | 0.805 | 100 mg/kg/24h CI | 0.843 | 100 mg/kg/24h CI | 0.843 |
|     | 90  | 150 mg/kg/24h CI | 0.843 | 150 mg/kg/24h CI | 0.843 | 100 mg/kg/24h CI | 0.805 | 100 mg/kg/24h CI | 0.838 |
|     | 100 | 200 mg/kg/24h CI | 0.843 | 150 mg/kg/24h CI | 0.843 | 150 mg/kg/24h CI | 0.843 | 150 mg/kg/24h CI | 0.822 |
|     | 110 | 200 mg/kg/24h CI | 0.843 | 150 mg/kg/24h CI | 0.843 | 150 mg/kg/24h CI | 0.843 | 150 mg/kg/24h CI | 0.843 |
|     | 120 | 200 mg/kg/24h CI | 0.843 | 200 mg/kg/24h CI | 0.843 | 150 mg/kg/24h CI | 0.843 | 150 mg/kg/24h CI | 0.843 |

|     |     | Body weight      |       |                  |       |                  |       |                  |       |
|-----|-----|------------------|-------|------------------|-------|------------------|-------|------------------|-------|
|     |     | 25               |       | 30               |       | 35               |       | 40               |       |
| CCR |     | Regimen          | PTA   | Regimen          | PTA   | Regimen          | PTA   | Regimen          | PTA   |
|     | 20  | 50 mg/kg/24h CI  | 0.511 | 50 mg/kg q12h    | 0.486 | 50 mg/kg q12h    | 0.429 | 50 mg/kg/24h CI  | 0.400 |
|     | 30  | 50 mg/kg/24h CI  | 0.782 | 50 mg/kg/24h CI  | 0.751 | 50 mg/kg/24h CI  | 0.751 | 50 mg/kg/24h CI  | 0.703 |
|     | 40  | 50 mg/kg/24h CI  | 0.843 | 50 mg/kg/24h CI  | 0.843 | 50 mg/kg/24h CI  | 0.843 | 50 mg/kg/24h CI  | 0.822 |
|     | 50  | 50 mg/kg/24h CI  | 0.805 | 50 mg/kg/24h CI  | 0.838 | 50 mg/kg/24h CI  | 0.843 | 50 mg/kg/24h CI  | 0.843 |
|     | 60  | 100 mg/kg/24h CI | 0.751 | 100 mg/kg/24h CI | 0.751 | 50 mg/kg/24h CI  | 0.765 | 50 mg/kg/24h CI  | 0.765 |
|     | 70  | 100 mg/kg/24h CI | 0.822 | 100 mg/kg/24h CI | 0.819 | 100 mg/kg/24h CI | 0.807 | 100 mg/kg/24h CI | 0.770 |
|     | 80  | 100 mg/kg/24h CI | 0.843 | 100 mg/kg/24h CI | 0.843 | 100 mg/kg/24h CI | 0.843 | 100 mg/kg/24h CI | 0.822 |
|     | 90  | 100 mg/kg/24h CI | 0.843 |
|     | 100 | 100 mg/kg/24h CI | 0.805 | 100 mg/kg/24h CI | 0.838 | 100 mg/kg/24h CI | 0.843 | 100 mg/kg/24h CI | 0.843 |
|     | 110 | 150 mg/kg/24h CI | 0.843 | 150 mg/kg/24h CI | 0.822 | 100 mg/kg/24h CI | 0.805 | 150 mg/kg/24h CI | 0.788 |
|     | 120 | 150 mg/kg/24h CI | 0.843 | 150 mg/kg/24h CI | 0.843 | 150 mg/kg/24h CI | 0.843 | 150 mg/kg/24h CI | 0.822 |

CCR, creatinine clearance in mL/min; CI, continuous infusion; PTA, probability of target attainment.

\* All extended regimens are infused over 4 hours.

**Table S3: Target attainment ( $C_{\min}$  10-40 mg/L) of optimal initial dose and drug label dose simulations using the validation dataset<sup>a</sup>**

| ID | Cefepime label dose |               |              | $C_{\min}$ achieved, mg/L | Cefepime optimal initial dose |               |              | $C_{\min}$ achieved, mg/L |
|----|---------------------|---------------|--------------|---------------------------|-------------------------------|---------------|--------------|---------------------------|
|    | Dose, mg            | Frequency, hr | Infusion, hr |                           | Dose, mg                      | Frequency, hr | Infusion, hr |                           |
| 1  | 2000                | 8             | 0.5          | 14.31                     | 4000                          | 24            | 24           | 23.16                     |
| 2  | 2000                | 8             | 0.5          | 11.77                     | 2000                          | 24            | 24           | 11.72                     |
| 3  | 2000                | 8             | 0.5          | 1.23                      | 4000                          | 24            | 24           | 12.19                     |
| 4  | 2000                | 8             | 0.5          | 11.72                     | 2000                          | 24            | 24           | 10.67                     |
| 5  | 2000                | 8             | 0.5          | 10.01                     | 4000                          | 24            | 24           | 17.24                     |
| 6  | 2000                | 8             | 0.5          | 20.55                     | 2000                          | 24            | 24           | 16.89                     |
| 7  | 2000                | 8             | 0.5          | 11.16                     | 2000                          | 24            | 24           | 12.44                     |
| 8  | 2000                | 8             | 0.5          | 12.66                     | 2000                          | 24            | 24           | 14.97                     |
| 9  | 2000                | 8             | 0.5          | 2.21                      | 4000                          | 24            | 24           | 12.09                     |
| 10 | 2000                | 8             | 0.5          | 24.56                     | 2000                          | 24            | 24           | 18.80                     |
| 11 | 2000                | 8             | 0.5          | 8.28                      | 2000                          | 24            | 24           | 10.44                     |
| 12 | 2000                | 8             | 0.5          | 35.71                     | 2000                          | 24            | 24           | 19.38                     |
| 13 | 2000                | 8             | 0.5          | 14.15                     | 2000                          | 24            | 24           | 13.59                     |
| 14 | 2000                | 8             | 0.5          | 50.66                     | 500                           | 8             | 4            | 16.75                     |
| 15 | 2000                | 8             | 0.5          | 37.33                     | 500                           | 8             | 4            | 10.64                     |
| 16 | 2000                | 8             | 0.5          | 6.49                      | 2000                          | 24            | 24           | 4.63                      |
| 17 | 2000                | 8             | 0.5          | 37.95                     | 2000                          | 24            | 24           | 19.90                     |
| 18 | 2000                | 8             | 0.5          | 10.75                     | 2000                          | 24            | 24           | 11.84                     |
| 19 | 2000                | 8             | 0.5          | 24.41                     | 4000                          | 24            | 24           | 22.97                     |
| 20 | 2000                | 8             | 0.5          | 12.31                     | 2000                          | 24            | 24           | 7.29                      |
| 21 | 2000                | 8             | 0.5          | 3.09                      | 2000                          | 24            | 24           | 3.59                      |
| 22 | 2000                | 8             | 0.5          | 0.13                      | 4000                          | 24            | 24           | 5.84                      |
| 23 | 2000                | 8             | 0.5          | 41.23                     | 2000                          | 24            | 24           | 26.82                     |
| 24 | 2000                | 12            | 0.5          | 32.37                     | 500                           | 8             | 4            | 13.09                     |
| 25 | 2000                | 8             | 0.5          | 10.68                     | 2000                          | 24            | 24           | 8.67                      |
| 26 | 2000                | 12            | 0.5          | 30.44                     | 500                           | 8             | 4            | 17.94                     |
| 27 | 2000                | 8             | 0.5          | 12.29                     | 4000                          | 24            | 24           | 25.62                     |
| 28 | 2000                | 8             | 0.5          | 8.55                      | 4000                          | 24            | 24           | 22.63                     |
| 29 | 2000                | 8             | 0.5          | 10.96                     | 4000                          | 24            | 24           | 23.16                     |
| 30 | 2000                | 8             | 0.5          | 64.29                     | 2000                          | 24            | 24           | 28.06                     |
| 31 | 2000                | 12            | 0.5          | 564.86                    | 500                           | 12            | 4            | 147.17                    |
| 32 | 2000                | 24            | 0.5          | 224.54                    | 500                           | 12            | 4            | 129.68                    |
| 33 | 1000                | 24            | 0.5          | 30.25                     | 500                           | 24            | 4            | 15.21                     |
| 34 | 2000                | 8             | 0.5          | 4.29                      | 2000                          | 24            | 24           | 1.65                      |

<sup>a)</sup> These datasets are from Roberts, Sime, and Whited et al. which were used for model validation.
